# Supplementary material for: Optimized hot electron injection from Cu nanoparticles to S-doped C3N4by the formed S–Cu bonds for an enhanced photocatalytic performance
Source: Royal Society of Chemistry journal article supplement (doi:10.1039/d1cp05743j), 2022-01-01
Supplement: d1cp05743j1.pdf [file d1cp05743j1.pdf]

# Optimized hot electron injection from Cu Nanoparticles to S-doped C<sub>3</sub>N<sub>4</sub> by the formed S-Cu bonds for enhanced photocatalytic performance

Qixiao Gai<sup>a,b</sup>, Shoutian Ren<sup>a\*</sup>, Xiaochun Zheng<sup>a,b</sup>, Wenjun Liu<sup>a\*</sup>, Quanli Dong<sup>a</sup>

<sup>a</sup> Department of Optoelectronic Science, Harbin Institute of Technology at Weihai, Weihai 264209, People's Republic of China

<sup>b</sup> Department of Physics, Harbin Institute of Technology, Harbin 150001, People's Republic of China

\*Corresponding author:

E-mail address: renst77@163.com; liuwenjun86@163.com

## Table of contents

**Fig. S1** (a) TEM image and (b-d) element mapping images of SCN.

**Fig. S2** (a) TEM, (b) HRTEM images and (c) element mapping of SCN-0.3Cu/Pt.

**Fig. S3** (a) XRD spectra and (b) FT-IR spectra of SCN-Cu/Pt.

**Table S1** The element mass percentage in SCN, SCN-0.3Cu and CN-0.35Cu.

**Fig. S4** XPS spectra of SCN, SCN-0.3Cu and CN-0.35Cu.

**Fig S5** High-resolution XPS spectra of (a) C 1s, (b) N 1s and (c) Cu 2p of CN-0.35Cu.

**Fig. S6** (a) Tauc plots of CN and SCN, (b) the SPR absorption spectra of Cu NPs extracted by the absorption difference between SCN-xCu and SCN, (c) M-S plots and (d) bandgap structures of CN and SCN.

**Fig. S7** Schematic diagram of various nitrogen atoms on C<sub>3</sub>N<sub>4</sub> in top view.

**Fig. S8** Final relaxed structures of (a) CN and (b-d) three SCN compounds in which the S atom has been replaced by one of the N atoms.

**Fig. S9** Calculated band structures of (a) CN and (b) SCN in which N atoms at site 2 are replaced by S atom, and charge density difference of (c) CN and (d) SCN (the pink and green colors indicate charge accumulation and loss), and (e) VBM, midgap states and CBM of SCN in the isosurface value of 0.002 eÅ<sup>-3</sup>.

**Fig. S10** Time courses of photocatalytic hydrogen production of (a) CN, SCN, CN-0.35Cu, different SCN-Cu and (b) SCN-0.3Cu/Pt.

**Fig. S11** XRD patterns of SCN-0.3Cu before and after photoreaction.

**Table S2** Entries in the table are fitted from EIS results.

**Fig. S12** Photocurrent response plots of CN-0.35Cu and SCN-0.3Cu with the addition of 0.001M of MVCl<sub>2</sub>.

**Fig. S13** Band structure of (a) CN-Cu and (b) SCN-Cu, and (c) their Gibbs free energy diagram for HER.

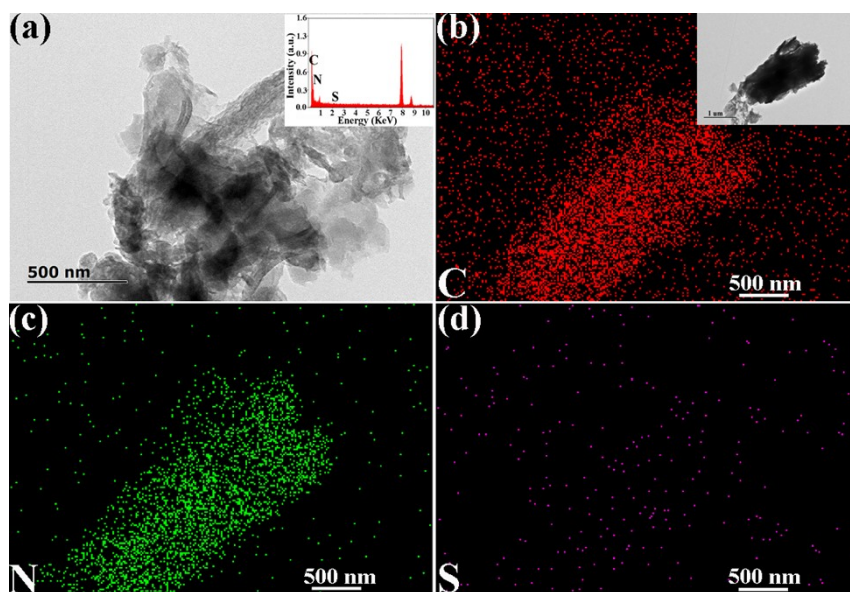

Fig. S1 (a) TEM image and (b-d) element mapping images of SCN. The insets in panel (a) and (b) correspond to its EDX spectrum and selected sample, respectively.

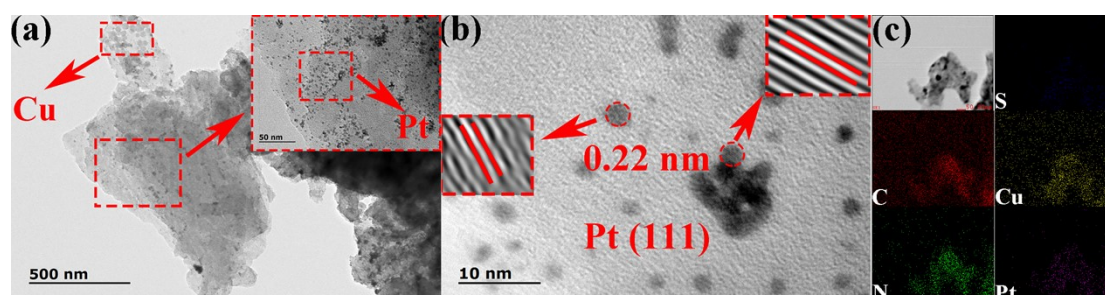

Fig. S2 (a) TEM, (b) HRTEM images and (c) element mapping of SCN-0.3Cu/Pt. Cu and Pt NPs are marked with red boxes in the upper left corner and inset of panel (a), respectively. The insets in panel (b) indicate that the lattice spacing of Pt is 0.22 nm.

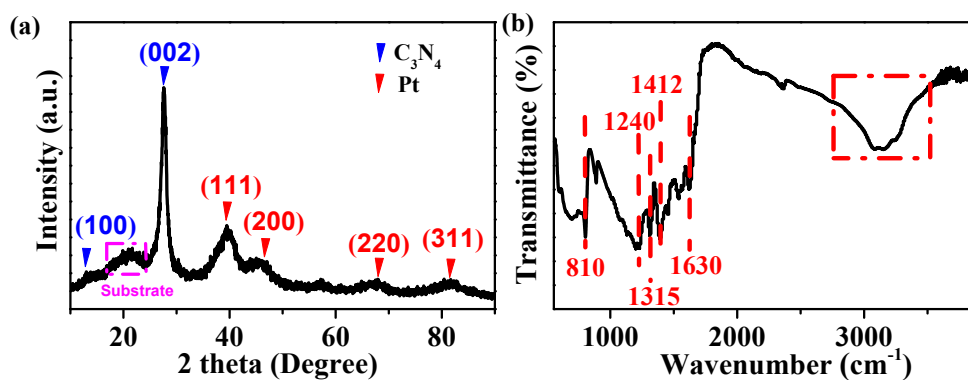

Fig. S3 (a) XRD spectra and (b) FT-IR spectra of SCN-Cu/Pt.

Table S1 The element mass percentage in SCN, SCN-0.3Cu and CN-0.35Cu.

| Catalyst<br>Elements | SCN    | SCN-0.3Cu | CN-0.35Cu |
|----------------------|--------|-----------|-----------|
| C                    | 35.95% | 38.66%    | 38.42%    |
| N                    | 61.45% | 54.86%    | 55.86%    |
| S                    | 0.33%  | 0.36%     | -         |
| O                    | 2.27%  | 5.59%     | 5.24%     |
| Cu                   | -      | 0.53%     | 0.48%     |

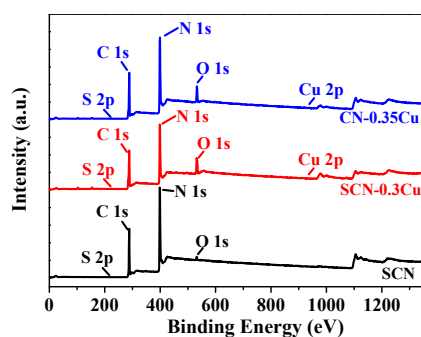

Fig. S4 XPS spectra of SCN, SCN-0.3Cu and CN-0.35Cu.

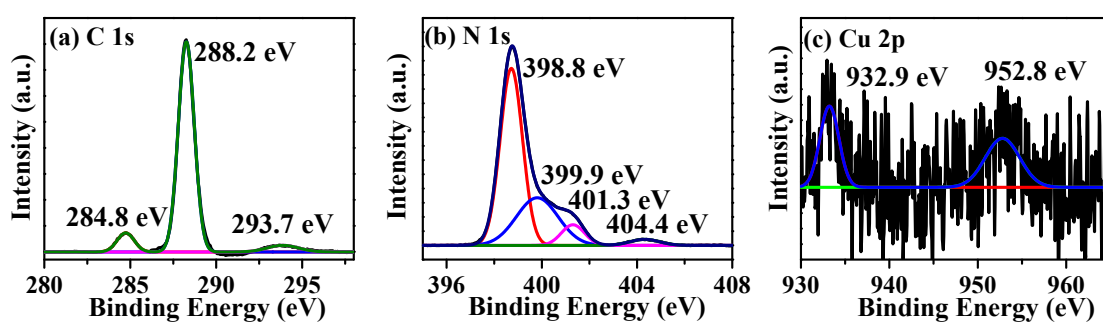

Fig. S5 High-resolution XPS spectra of (a) C 1s, (b) N 1s and (c) Cu 2p of CN-0.35Cu.

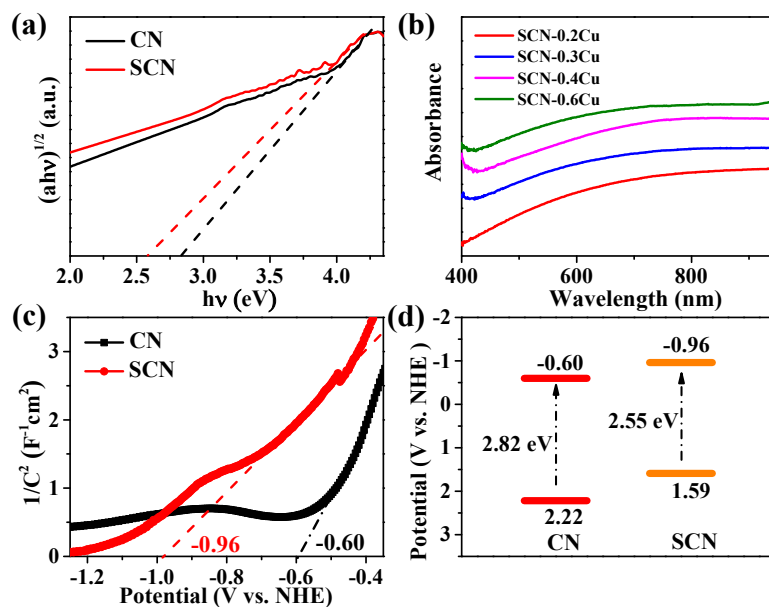

Fig. S6 (a) Tauc plots of CN and SCN, (b) the SPR absorption spectra of Cu NPs extracted by the absorption difference between SCN-xCu and SCN, (c) M-S plots and (d) bandgap structures of CN and SCN.

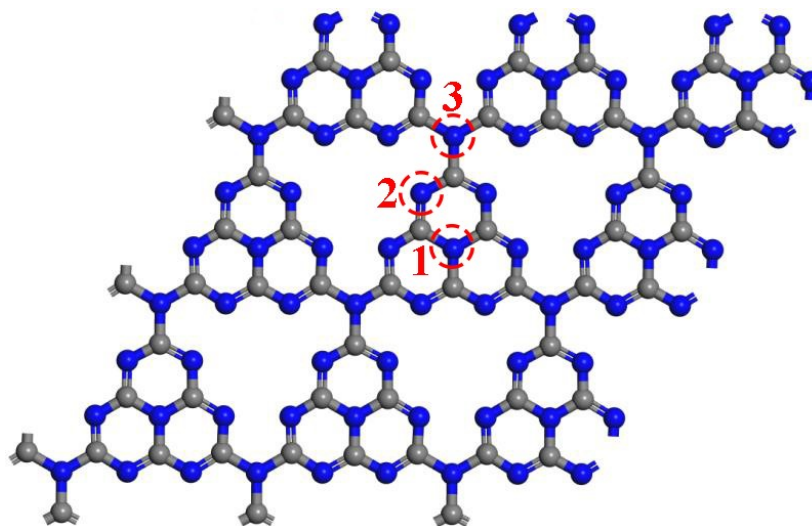

Fig. S7 Schematic diagram of various nitrogen atoms on  $C_3N_4$  in top view.

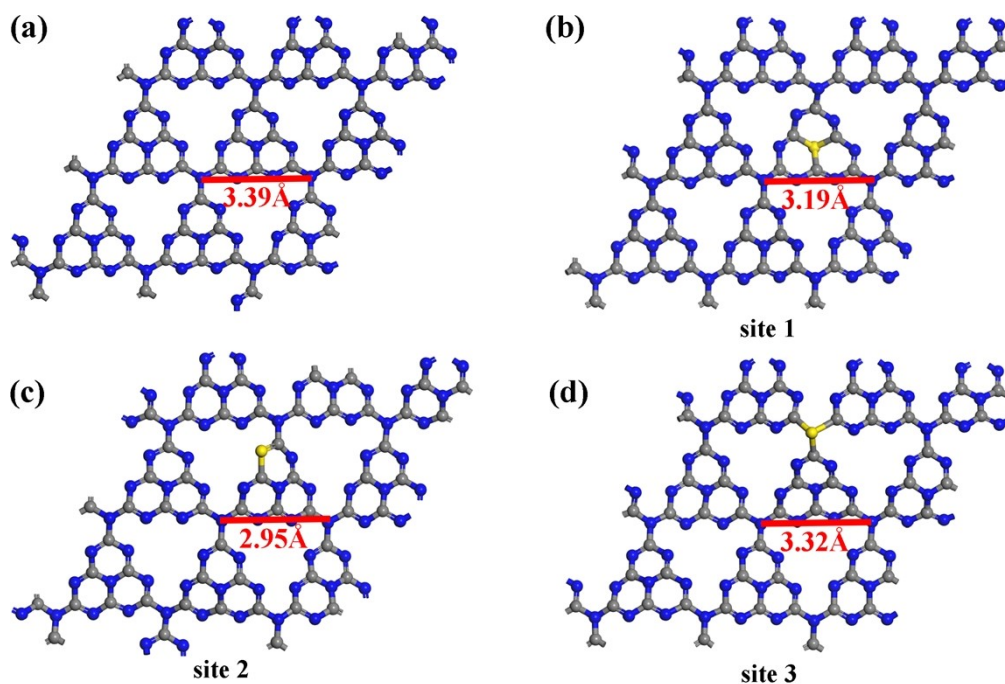

Fig. S8 Final relaxed structures of (a) CN and (b-d) three SCN compounds in which the S atom has been replaced by one of the N atoms.

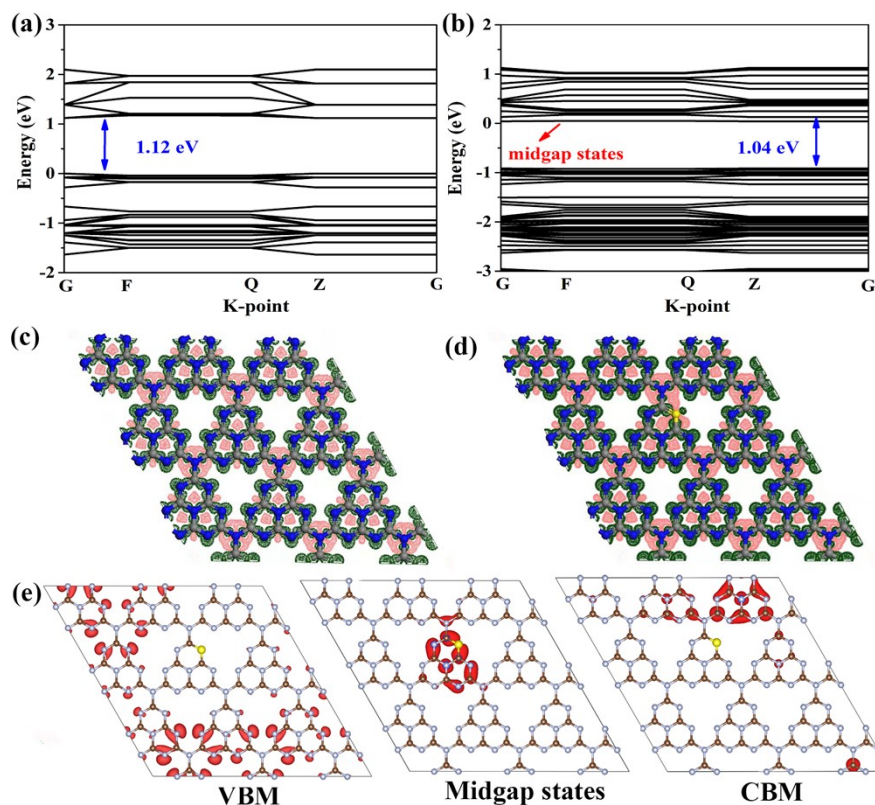

Fig. S9 Calculated band structures of (a) CN and (b) SCN in which N atoms at site 2 are replaced by S atom, and charge density difference of (c) CN and (d) SCN (the pink and green colors indicate charge accumulation and loss), and (e) VBM, midgap states and CBM of SCN in the isosurface value of  $0.002 \text{ e}\text{\AA}^{-3}$ .

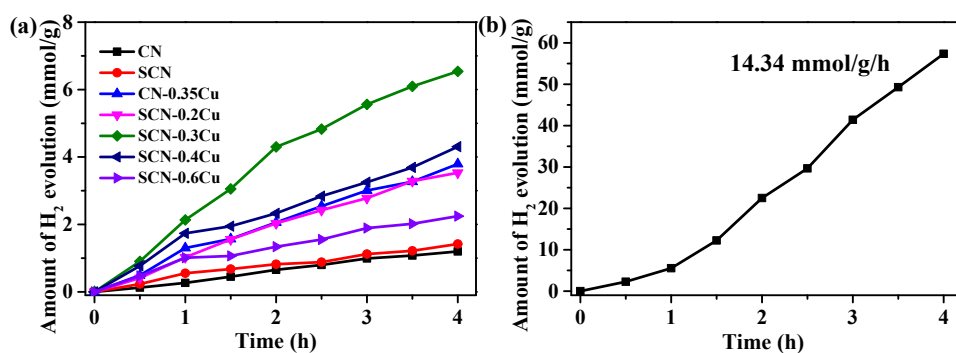

Fig. S10 Time courses of photocatalytic hydrogen production of (a) CN, SCN, CN-0.35Cu, different SCN-Cu and (b) SCN-0.3Cu/Pt.

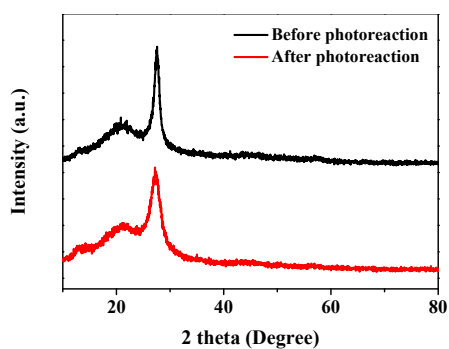

Fig. S11 XRD patterns of SCN-0.3Cu before and after photoreaction.

Table S2 Entries in the table are fitted from EIS results (Fig. 6a).

| Samples          | CN     | SCN    | CN-Cu | SCN-Cu |
|------------------|--------|--------|-------|--------|
| Rs ( $\Omega$ )  | 0.29   | 0.38   | 0.25  | 0.26   |
| Rct ( $\Omega$ ) | 2871.0 | 1871.0 | 966.9 | 400.0  |

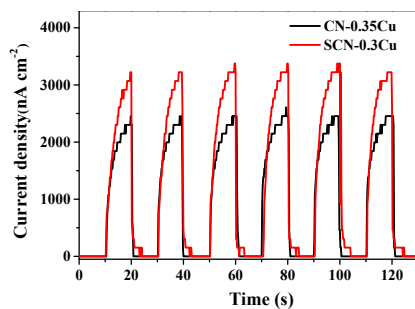

Fig. S12 Photocurrent response plots of CN-0.35Cu and SCN-0.3Cu with the addition of 0.001M of  $MVCl_2$ .

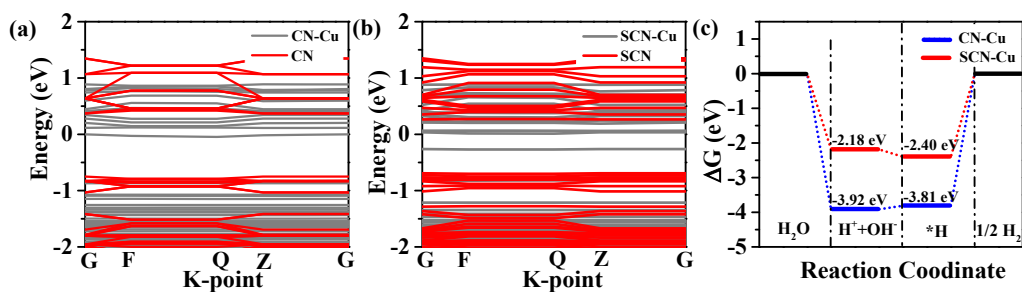

Fig. S13 Band structure of (a) CN-Cu and (b) SCN-Cu, and (c) their Gibbs free energy diagram for HER.
